# Supplementary material for: Heilipussquamosus (LeConte, 1824): clarification of the correct name for the “avocado tree girdler” with updates on its biology and distribution (Coleoptera, Curculionidae, Molytinae, Hylobiini)
Source: Biodivers Data J. 2022 Sep 30;10:e85499. doi: 10.3897/BDJ.10.e85499 (PMC9836544; doi:10.3897/BDJ.10.e85499)
Supplement: Supplementary material 1 — Heilipussquamosus records observed in this study, separated by record type [file bdj-10-e85499-s001.xlsx]

## Sheet: iNaturalist_BugGuide
country	stateProvince	county	locality	decimalLatitude	decimalLongitude	recordedBy	eventDate	basisOfRecord	occurrenceID
USA	AL	Winston	Haleyville	34.093	-87.614	M. Massa	2020-07-28	HumanObservation	https://www.inaturalist.org/observations/54671160
USA	AR	Craighead	Saint Francis Sunken Lands	35.725	-90.417	G. Snelling	2019-07-14	HumanObservation	https://www.inaturalist.org/observations/28839894	https://bugguide.net/node/view/1694452/bgimage
USA	AR	Madison	Ozark Natural Science Center	36.257	-93.704	A. Schaffer	2012-07-31	HumanObservation	https://www.inaturalist.org/observations/102780443
USA	AR	White	Searcy	35.255	-91.694	eagleheadblue	2022-07-21	HumanObservation	https://www.inaturalist.org/observations/127296814
USA	FL	Baker	Osceola NF, Ocean Pond Campground	30.41	-82.331	W. Chatfield-Taylor	2008-03-15	HumanObservation	https://www.inaturalist.org/observations/33440986	https://bugguide.net/node/view/174981/bgimage
USA	FL	Clay	Lakeside	30.143	-81.763	anonymous904	2022-03-21	HumanObservation	https://www.inaturalist.org/observations/109907296
USA	FL	Duval	Jacksonville	30.07	-82.002	abadam82	2022-04-27	HumanObservation	https://www.inaturalist.org/observations/119165560
USA	FL	Hernando		28.442	-82.331	johantarzan4600	2017-06-19	HumanObservation	https://www.inaturalist.org/observations/9003141
USA	FL	Levy	Williston	29.416	-82.562	santafesandy	2019-11-05	HumanObservation	https://www.inaturalist.org/observations/35547314
USA	FL	Osceola	Holopaw	28.135	-81.077	Loret_in_Florida	2012-05-14	HumanObservation	https://bugguide.net/node/view/642331/bgimage
USA	FL	Osceola	Kissimmee Park	28.304	-81.425	M. Veater	2009-08-02	HumanObservation	https://bugguide.net/node/view/1002931/bgimage
USA	FL	Polk	Ft. Meade	27.755	-81.798	egmurrell	2006-07-24	HumanObservation	https://bugguide.net/node/view/82994/bgimage
USA	GA	Liberty		31.61	-81.51	erincork	2022-05-00	HumanObservation	https://www.inaturalist.org/observations/117226103
USA	GA	Ware		30.904	-82.447	J.N. Dell	2008-06-15	HumanObservation	https://bugguide.net/node/view/191025/bgimage
USA	GA	Ware		30.904	-82.447	J.N. Dell	2008-06-16	HumanObservation	https://bugguide.net/node/view/191296/bgimage
USA	KS	Cherokee	Shermerhorn Park	37.043	-94.642	G.A. Salsbury	2008-07-07	HumanObservation	https://bugguide.net/node/view/1810636/bgimage
USA	KY	Johnson		37.805	-82.864	A. Bowen	2021-07-28	HumanObservation	https://www.inaturalist.org/observations/88961539
USA	KY	Madison		37.56	-84.234	J. Abrams	2021-06-02	HumanObservation	https://www.inaturalist.org/observations/81321720
USA	KY	Madison		37.56	-84.236	J. Abrams	2021-07-22	HumanObservation	https://www.inaturalist.org/observations/88160916
USA	KY	Madison		37.566	-84.242	J. Abrams	2020-07-30	HumanObservation	https://www.inaturalist.org/observations/54929804
USA	KY	Muhlenberg		37.211	-87.139	E. Williams	2017-08-08	HumanObservation	https://bugguide.net/node/view/1421274/bgimage
USA	LA	Vernon	Pitkin	30.936	-92.936	C. Allen	2017-11-06	HumanObservation	https://bugguide.net/node/view/1464827/bgimage
USA	MO	Carter	Eastwood	36.89	-91.033	D. Swofford	2006-07-24	HumanObservation	https://bugguide.net/node/view/67536/bgimage
USA	MS	Marshall		34.768	-89.507	S. McGee	2020-06-12	HumanObservation	https://bugguide.net/node/view/1832216/bgimage
USA	NC	Beaufort	Goose Creek State Park	35.474	-78.911	K. Kittelberger	2014-09-27	HumanObservation	https://bugguide.net/node/view/1095521/bgimage
USA	NC	Brunswick	Leland	34.185	-78.035	D. Schofield	2021-07-29	HumanObservation	https://www.inaturalist.org/observations/89426951
USA	NC	Chatham	Siler City	35.6975	-79.543	man4nature	2020-08	HumanObservation	https://www.inaturalist.org/observations/55271800
USA	NC	Dare	Kill Devil Hills	35.989	-75.665	J. Smith	2017-05-17	HumanObservation	https://www.inaturalist.org/observations/6247847
USA	NC	Onslow	Jacksonville	34.698	-77.346	D. Tampanello	2021-05-02	HumanObservation	https://www.inaturalist.org/observations/76756635
USA	OK	Tulsa		36.229	-95.924	T. Shahan	2021-08	HumanObservation	https://www.inaturalist.org/observations/89537397
USA	OK	Tulsa		36.229	-95.924	T. Shahan	2021-06	HumanObservation	https://www.inaturalist.org/observations/84656392
USA	OK	Tulsa		36.229	-95.924	T. Shahan	2020-07	HumanObservation	https://www.inaturalist.org/observations/54896698
USA	OK	Tulsa		36.229	-95.924	T. Shahan	2020-07	HumanObservation	https://www.inaturalist.org/observations/51874083
USA	SC	Charleston	McClellanville	33.057	-79.631	katbrun77	2020-05-16	HumanObservation	https://www.inaturalist.org/observations/46149465
USA	SC	Dillon		34.402	-79.34	W. McGighan	2014-09-03	HumanObservation	https://bugguide.net/node/view/991356/bgimage
USA	TN	Davidson	Burns	36.096	-87.004	mothgoggles	2019-07-12	HumanObservation	https://www.inaturalist.org/observations/28749315
USA	TN	Davidson		36.096	-87.004	kbeachus	2021-06-24	HumanObservation	https://www.inaturalist.org/observations/84385372
USA	TN	Madison	Beech Bluff	35.596	-88.631	K. Childs	2020-07-26	HumanObservation	https://bugguide.net/node/view/1864268/bgimage
USA	TX	Gregg	Gladewater	32.524	-94.943	amandahildebrant	2021-07-17	HumanObservation	https://www.inaturalist.org/observations/87395191
USA	VA	Albemarle		38.151	-78.688	jeffniz	2021-06	HumanObservation	https://www.inaturalist.org/observations/82429475
USA	VA	Nottoway	Burkeville	37.162	-78.187	maxmom	2021-08-10	HumanObservation	https://www.inaturalist.org/observations/90685277
USA	VA	Spotsylvania	Prospect Hill	38.248	-77.435	F. Kelso	2020-08-11	HumanObservation	https://www.inaturalist.org/observations/56180991	https://bugguide.net/node/view/1893071/bgimage
USA	VA	Spotsylvania	near Fredericksburg	38.218	-77.486	zemtec	2022-04-28	HumanObservation	https://www.inaturalist.org/observations/113222782

## Sheet: Specimens
country	stateProvince	county	locality	decimalLatitude	decimalLongitude	recordedBy	eventDate	basisOfRecord	InstitutionCode	catalogNumber
USA	AL	Baldwin	Bay Minette	30.88	-87.774	F. Turner	1952-09-30	PreservedSpecimen	AUMNH	141874
USA	AL	Limestone	Elkmont	34.929	-86.976	R. Rooker	1945-07-19	PreservedSpecimen	AUMNH	141871
USA	AL	Wilcox	Camden	31.998	-87.298	Thatcher	1940-07-22	PreservedSpecimen	AUMNH	141872
USA	AL	Wilcox	Camden	31.998	-87.298	Thatcher	1940-07-22	PreservedSpecimen	AUMNH	141873
USA	FL	Alachua	Gainesville	29.62	-82.343	P. Skelley	1997-01-03	PreservedSpecimen	ASUCOB	ASUCOB0026326
USA	FL	Alachua	Gainesville	29.62	-82.343	R. Duffield, B. Freeman	1975-07-25	PreservedSpecimen	UGCA
USA	FL	Alachua	Gainesville	29.707	-82.359			PreservedSpecimen	FSCA
USA	FL	Alachua	2 mi N Gainesville	29.713	-82.354			PreservedSpecimen	FSCA
USA	FL	Alachua	2 mi N Cross Creek	29.511	-82.17			PreservedSpecimen	FSCA
USA	FL	Duval	Jacksonville	30.342	-81.705			PreservedSpecimen	FSCA
USA	FL	Gilchrist	along hwy. 26	29.62	-82.786	R. Morris	1990-05-06	PreservedSpecimen	CMNC
USA	FL	Highlands	Archbold Biological Station, north of Lake Annie	27.212	-81.348	M. Deyrup	2001-03-19	PreservedSpecimen	ABS	ARTHARCH00053023
USA	FL	Highlands	Sebring, Highlands Hammock S.P.	27.472	-81.548			PreservedSpecimen	FSCA
USA	FL	Highlands	Sebring, Highlands Hammock S.P.	27.472	-81.548			PreservedSpecimen	FSCA
USA	FL	Lake	Forest Hills	29.002	-81.425	F.W. Skillman Jr.	1989-03-26	PreservedSpecimen	ASUCOB	ASUCOB0026327
USA	FL	Leon	Chaires	30.436	-84.117	W.R. Sutert	1976-11-06	PreservedSpecimen	ASUCOB	ASUCOB0026325
USA	FL	Levy	Otter Ck. NE of Devil's Hammock	29.441	-82.723			PreservedSpecimen	FSCA
USA	FL	Miami-Dade	Homestead	25.469	-80.477	D.O. Wolfenbarger	1955-06-17	PreservedSpecimen	ASUCOB	ASUCOB0026323
USA	FL	Miami-Dade	Homestead	25.469	-80.477	O.D. Link	1948-10-14	PreservedSpecimen	ASUCOB	ASUCOB0026324
USA	FL	Miami-Dade	Homestead	25.469	-80.477			PreservedSpecimen	FSCA
USA	FL	Miami-Dade	Homestead	25.469	-80.477			PreservedSpecimen	FSCA
USA	FL	Miami-Dade	Homestead	25.469	-80.477			PreservedSpecimen	FSCA
USA	FL	Miami-Dade	Miami	25.81	-80.196	H. Howden, A. Howden	1950-04-00	PreservedSpecimen	CMNC
USA	FL	Miami-Dade	Richmond	25.61	-80.43			PreservedSpecimen	FSCA
USA	FL	Miami-Dade		25.81	-80.196			PreservedSpecimen	FSCA
USA	FL	Monroe	Upper Key Largo	25.24	-80.325	Morris, Brattain	1992-06-15	PreservedSpecimen	CMNC
USA	FL	Orange	Apopka	28.689	-81.528			PreservedSpecimen	FSCA
USA	FL	Sarasota		27.34	-82.52			PreservedSpecimen	FSCA
USA	GA	Glynn	St. Simon	31.183	-81.382	C. Driver	1947-05-11	PreservedSpecimen	UGCA
USA	GA	Troup	LaGrange	33.035	-85.035	I. Ball	1939-06-14	PreservedSpecimen	UGCA
USA	GA	Wayne	Jesup	31.591	-81.892		1938-06-07	PreservedSpecimen	UGCA
USA	KY	Muhlenberg		37.222	-87.114		2016	PreservedSpecimen	MEM
USA	LA	Grant	Stuart Lake Recreation Area	31.511	-92.445	E.G. Riley	1982-07-22	PreservedSpecimen	LSAM	LSAM0142100
USA	LA	Saint Tammany	4.2 miles northeast Abita Springs	30.516	-89.955	V.A. Brou	1994-08-05	PreservedSpecimen	LSAM	LSAM0089305
USA	LA	Saint Tammany	4.2 miles northeast Abita Springs	30.516	-89.955	V.A. Brou	1998-08-04	PreservedSpecimen	LSAM	LSAM0089307
USA	LA	Saint Tammany	4.2 miles northeast Abita Springs	30.516	-89.955	V.A. Brou	1999-07-19	PreservedSpecimen	LSAM	LSAM0089309
USA	LA	Saint Tammany	4.2 miles northeast Abita Springs	30.516	-89.955	V.A. Brou	2000-05-09	PreservedSpecimen	LSAM	LSAM0089306
USA	LA	Saint Tammany	4.2 miles northeast Abita Springs	30.516	-89.955	V.A. Brou	2001-04-09	PreservedSpecimen	LSAM	LSAM0089309
USA	MS	Jasper	Bay Springs	31.979	-89.277		1947	PreservedSpecimen	MEM
USA	MS	Warren	Vicksburg	32.303	-90.882		2011	PreservedSpecimen	MEM
USA	MS	Winston	Tombigbee National Forest	33.255	-89.091		1999	PreservedSpecimen	MEM
USA	NC	Bertie	Windsor	36.071	-76.953	G.B. Lay	1934-06-04	PreservedSpecimen	NCSU
USA	NC	Brunswick	Southport	33.928	-78.013	W.J. Gehweiler	1951-08-12	PreservedSpecimen	NCSU
USA	NC	Columbus	Lake Waccamaw State Park	34.258	-78.484	W.D. Merritt, J. Ciegler	2009-05-21	PreservedSpecimen	NCSU
USA	NC	Craven	Havelock	34.943	-76.881	F.W. Shermaan	1907-05	PreservedSpecimen	NCSU
USA	NC	Dare		35.806	-75.753		1961-06-14	PreservedSpecimen	NCSU
USA	NC	Johnston	Central Crops Research Station	35.668	-78.502	D.W. Williams	1976-10-01	PreservedSpecimen	NCSU
USA	NC	Lenoir	Kinston	35.276	-77.587	Agent	1938-08-12	PreservedSpecimen	NCSU
USA	NC	Tyrell	First Colony Farms	35.817	-76.203		1975-05-26	PreservedSpecimen	NCSU
USA	NC	Wake	Raleigh	35.786	-78.638	C.S. Brimley	1935-07-20	PreservedSpecimen	NCSU
USA	TN	Sevier	Green Br Gr. Smoky Mt. Nat. Pk.	35.712	-83.385	H. Howden, A. Howden	1957-05-18	PreservedSpecimen	CMNC
USA	TN	Sevier	Fighting Creek Trail, at Sugarlands Visitor Center	35.685	-83.541	M.L. Ferro	2004-06-04	PreservedSpecimen	LSAM	LSAM0098707
USA	VA	Isle of Wight	Antioch Natural Area Pres.	36.829	-75.845	D. Loomis, A.V. Evans	2009-07-09	PreservedSpecimen	CMNC
USA	VA		Virginia Beach, First Landing State Park	36.906	-76.022	R. Vigneault	2003-06-23-07-07	PreservedSpecimen	VMNH
USA	VA		Virginia Beach, First Landing State Park	36.906	-76.022	R. Vigneault	2003-06-23-07-07	PreservedSpecimen	VMNH
USA	VA		Virginia Beach, First Landing State Park	36.906	-76.022	R. Vigneault	2003-06-23-07-07	PreservedSpecimen	VMNH
USA	VA		Virginia Beach, First Landing State Park	36.906	-76.022	K.A. Buhlmann	1989	PreservedSpecimen	VMNH

## Sheet: Literature
country	stateProvince	county	locality	decimalLatitude	decimalLongitude	identificationReferences
USA	FL	Brevard	Allenhurst	28.736	-80.756	Woodruff 1963
USA	FL	Brevard	Cocoa	28.374	-80.774	Woodruff 1963
USA	FL	Brevard	Courtenay	28.456	-80.587	Woodruff 1963
USA	FL	Brevard	Malabar	27.988	-80.587	Woodruff 1963
USA	FL	Brevard	Merritt	28.348	-80.691	Woodruff 1963
USA	FL	Brevard	Shiloh	28.792	-80.804	Woodruff 1963
USA	FL	Broward	Dania	26.056	-80.17	Woodruff 1963
USA	FL	Broward	Davie	26.079	-80.251	Woodruff 1963
USA	FL	DeSoto	Fort Ogden	27.087	-81.952	Woodruff 1963
USA	FL	Highlands	Lake Placid	27.3	-81.371	Woodruff 1963
USA	FL	Hillsborough	Riverview	27.866	-82.326	Woodruff 1963
USA	FL	Indian River	Roseland	27.834	-80.491	Woodruff 1963
USA	FL	Indian River	Vero Beach	27.645	-80.408	Woodruff 1963
USA	FL	Indian River	Wabasso	27.748	-80.436	Woodruff 1963
USA	FL	Lee	Fort Myers	26.625	-81.846	Woodruff 1963
USA	FL	Martin	Jensen Beach	27.238	-80.231	Woodruff 1963
USA	FL	Martin	Salerno	27.157	-80.185	Woodruff 1963
USA	FL	Martin	Stuart	27.188	-80.24	Woodruff 1963
USA	FL	Miami-Dade	Florida City	25.445	-80.479	Woodruff 1963
USA	FL	Miami-Dade	Goulds	25.563	-80.388	Woodruff 1963
USA	FL	Miami-Dade	Homestead	25.466	-80.45	Woodruff 1963
USA	FL	Miami-Dade	Miami	25.81	-80.196	Woodruff 1963
USA	FL	Miami-Dade	Perrine	25.6	-80.355	Woodruff 1963
USA	FL	Miami-Dade	South Miami	25.709	-80.295	Woodruff 1963
USA	FL	Orange	Doctor Phillips	28.452	-81.493	Woodruff 1963
USA	FL	Osceola	Kissimmee Park	28.306	-81.399	Woodruff 1963
USA	FL	Pasco	Blanton	28.415	-82.249	Woodruff 1963
USA	FL	Pinellas	St. Petersburg	27.776	-82.666	Woodruff 1963
USA	FL	Polk	Auburndale	28.09	-81.791	Woodruff 1963
USA	FL	Polk	Lake Alfred	28.098	-81.73	Woodruff 1963
USA	FL	Volusia	Enterprise	28.864	-81.247	Blatchley and Leng 1916
USA	GA	Effingham		32.39	-81.35	Fraedrich et al. 2011
USA	SC	Beaufort		32.467	-80.72	Ciegler 2010
USA	SC	Colleton	Walterboro	32.901	-80.672	Hoffman 2003, Ciegler 2010
USA	SC	Florence		34.187	-79.764	Hoffman 2003, Ciegler 2010
