# Supplementary material for: Heilipussquamosus (LeConte, 1824): clarification of the correct name for the “avocado tree girdler” with updates on its biology and distribution (Coleoptera, Curculionidae, Molytinae, Hylobiini)
Source: Biodivers Data J. 2022 Sep 30;10:e85499. doi: 10.3897/BDJ.10.e85499 (PMC9836544; doi:10.3897/BDJ.10.e85499)
Supplement: Supplementary material 2 — iNaturalist records of H.squamosus [file bdj-10-e85499-s002.csv]

id	observed_on_string	observed_on	time_observed_at	time_zone	user_id	user_login	created_at	updated_at	quality_grade	license	url	image_url	sound_url	tag_list	description	num_identification_agreements	num_identification_disagreements	captive_cultivated	oauth_application_id	place_guess	latitude	longitude	positional_accuracy	public_positional_accuracy	geoprivacy	taxon_geoprivacy	coordinates_obscured	positioning_method	positioning_device	species_guess	scientific_name	common_name	iconic_taxon_name	taxon_id
6247847	2017-05-17 11:35:01 AM EDT	2017-05-17	2017-05-17 15:35:01 UTC	Eastern Time (US & Canada)	341309	jamie43	2017-05-17 15:40:08 UTC	2020-07-14 11:05:55 UTC	research		https://www.inaturalist.org/observations/6247847	https://static.inaturalist.org/photos/7854789/medium.jpeg				2	0	false	2	701 Ocean Acres Drive Kill Devil Hills, NC 27948	35.98914115	-75.66494263	9	9			false			Avocado Weevil	Heilipus apiatus	Avocado Weevil	Insecta	546409
9003141	2017/06/19 1:41 PM EDT	2017-06-19	2017-06-19 17:41:00 UTC	Eastern Time (US & Canada)	555226	johantarzan4600	2017-12-01 01:46:07 UTC	2018-04-11 10:55:19 UTC	research		https://www.inaturalist.org/observations/9003141	https://static.inaturalist.org/photos/12135541/medium.jpg				2	0	false		Hernando County, FL, USA	28.4420581565	-82.3310869931	8	8			false			Avocado Weevil	Heilipus apiatus	Avocado Weevil	Insecta	546409
28749315	2019/07/12 2:10 PM -0500	2019-07-12	2019-07-12 19:10:00 UTC	Bogota	1766917	mothgoggles	2019-07-13 19:22:33 UTC	2020-07-14 11:53:57 UTC	research	CC-BY-NC-ND	https://www.inaturalist.org/observations/28749315	https://inaturalist-open-data.s3.amazonaws.com/photos/44834426/medium.jpg				2	0	false		1020 Jackson Hill Rd, Burns, TN 37029, USA	36.0882982	-87.278629	3817	3817			false			Avocado Weevil	Heilipus apiatus	Avocado Weevil	Insecta	546409
28839894	2019-07-14	2019-07-14		Central Time (US & Canada)	155080	gcsnelling	2019-07-15 01:19:20 UTC	2020-09-03 10:44:01 UTC	research	CC-BY	https://www.inaturalist.org/observations/28839894	https://inaturalist-open-data.s3.amazonaws.com/photos/44982752/medium.jpg			Mixed hardwood/pine woodland.	1	0	false		Saint Francis Sunken Lands, Craighead County, Arkansas	35.724952	-90.41737	215	215			false			Avocado Weevil	Heilipus apiatus	Avocado Weevil	Insecta	546409
33440986	2008/03/15 2:41 PM EDT	2008-03-15	2008-03-15 18:41:00 UTC	Eastern Time (US & Canada)	443199	willc-t	2019-09-26 18:43:11 UTC	2021-03-18 17:31:05 UTC	research		https://www.inaturalist.org/observations/33440986	https://static.inaturalist.org/photos/52523607/medium.jpg			det. Michale C. Thomas 2008	1	0	false		Baker County, FL, USA	30.4061497396	-82.3306133514	9381	9381			false			Avocado Weevil	Heilipus apiatus	Avocado Weevil	Insecta	546409
35547314	Tue Nov 05 2019 07:04:49 GMT-0500 (EST)	2019-11-05	2019-11-05 12:04:49 UTC	Eastern Time (US & Canada)	2370010	santafesandy	2019-11-10 22:37:22 UTC	2019-11-11 15:56:18 UTC	research	CC-BY-NC	https://www.inaturalist.org/observations/35547314	https://inaturalist-open-data.s3.amazonaws.com/photos/56063194/medium.jpg			Could this actually be a weevil?	3	0	false	3	NE 127th Ct, Williston, FL, US	29.4160715785	-82.5616514757	1614	1614			false			Avocado Weevil	Heilipus apiatus	Avocado Weevil	Insecta	546409
46149465	2020-05-16 3:03:16 PM EDT	2020-05-16	2020-05-16 19:03:16 UTC	Eastern Time (US & Canada)	623341	katbrun77	2020-05-16 21:55:21 UTC	2020-07-15 20:48:42 UTC	research	CC-BY-NC	https://www.inaturalist.org/observations/46149465	https://inaturalist-open-data.s3.amazonaws.com/photos/73193634/medium.jpeg			MCCLELLANVLE, SC 29458, USA	1	0	false	2	MCCLELLANVLE, SC 29458, USA	33.0573531814	-79.6314064041	510	510			false	gps	gps	Avocado Weevil	Heilipus apiatus	Avocado Weevil	Insecta	546409
51874083	2020/07/03 11:44 AM CDT	2020-07-03	2020-07-03 16:44:00 UTC	Central Time (US & Canada)	2042957	tshahan	2020-07-04 05:06:40 UTC	2020-07-04 05:32:26 UTC	needs_id	CC-BY-NC-ND	https://www.inaturalist.org/observations/51874083	https://inaturalist-open-data.s3.amazonaws.com/photos/82440502/medium.jpg				1	0	false		Oklahoma, US	36.2243560201	-95.9986913172	3095	28563	obscured		true			Avocado Weevil	Heilipus apiatus	Avocado Weevil	Insecta	546409
54671160	2020-07-28 11:08:43 AM CDT	2020-07-28	2020-07-28 15:08:43 UTC	Eastern Time (US & Canada)	817009	snailkites	2020-07-28 20:53:06 UTC	2020-07-28 22:36:30 UTC	needs_id		https://www.inaturalist.org/observations/54671160	https://static.inaturalist.org/photos/87004599/medium.jpeg				1	0	false	2	Haleyville, AL 35565, USA	34.0930420278	-87.6138126389					false			Avocado Weevil	Heilipus apiatus	Avocado Weevil	Insecta	546409
54896698	2020/07/30 10:45 AM CDT	2020-07-30	2020-07-30 15:45:00 UTC	Central Time (US & Canada)	2042957	tshahan	2020-07-31 00:45:44 UTC	2021-03-18 04:20:15 UTC	research	CC-BY-NC-ND	https://www.inaturalist.org/observations/54896698	https://inaturalist-open-data.s3.amazonaws.com/photos/87376176/medium.jpg				1	0	false		Oklahoma, US	36.2828482911	-95.8748163705	12568	28563	obscured		true			Avocado Weevil	Heilipus apiatus	Avocado Weevil	Insecta	546409
54929804	2020/07/30 7:33 PM EDT	2020-07-30	2020-07-30 23:33:00 UTC	Eastern Time (US & Canada)	746176	john_abrams	2020-07-31 14:20:22 UTC	2020-08-02 03:59:15 UTC	research	CC-BY	https://www.inaturalist.org/observations/54929804	https://static.inaturalist.org/photos/87431791/medium.jpeg				2	0	false		Madison, Kentucky, United States	37.5656466667	-84.242145					false			Avocado Weevil	Heilipus apiatus	Avocado Weevil	Insecta	546409
55271800	Mon Aug 03 2020 07:27:26 GMT-0400 (EDT)	2020-08-03	2020-08-03 11:27:26 UTC	Eastern Time (US & Canada)	597776	man4nature	2020-08-03 13:13:33 UTC	2020-08-08 20:58:39 UTC	research		https://www.inaturalist.org/observations/55271800	https://static.inaturalist.org/photos/88001167/medium.jpg				1	0	false	3	North Carolina, US	35.7165233518	-79.543495475	6548	28649	obscured		true			Avocado Weevil	Heilipus apiatus	Avocado Weevil	Insecta	546409
56180991	2020-08-11 7:21:51 PM EDT	2020-08-11	2020-08-11 23:21:51 UTC	Eastern Time (US & Canada)	2038537	kidneymoth	2020-08-12 00:48:47 UTC	2020-08-12 11:13:35 UTC	research	CC-BY-NC	https://www.inaturalist.org/observations/56180991	https://inaturalist-open-data.s3.amazonaws.com/photos/89509814/medium.jpeg			On Hemp dogbane	1	0	false	2	Prospect Hill	38.2482848587	-77.4354369566	263	263			false	gps	gps	Avocado Weevil	Heilipus apiatus	Avocado Weevil	Insecta	546409
76756635	2021-05-02 19:56:25	2021-05-02	2021-05-02 23:56:25 UTC	Eastern Time (US & Canada)	2665029	davidtampanello	2021-05-02 23:58:40 UTC	2021-05-03 16:55:23 UTC	research		https://www.inaturalist.org/observations/76756635	https://static.inaturalist.org/photos/125535831/medium.jpeg				2	0	false	2	Jacksonville, NC, USA	34.6975921859	-77.346101962	5	5			false	gps	gps	Avocado Weevil	Heilipus apiatus	Avocado Weevil	Insecta	546409
81321720	2021/06/02 10:37 AM EDT	2021-06-02	2021-06-02 14:37:00 UTC	Eastern Time (US & Canada)	746176	john_abrams	2021-06-02 16:51:38 UTC	2021-06-02 20:07:35 UTC	research	CC-BY	https://www.inaturalist.org/observations/81321720	https://static.inaturalist.org/photos/133370893/medium.jpeg				1	0	false		Madison, Kentucky, United States	37.5599683333	-84.2339					false			Avocado Weevil	Heilipus apiatus	Avocado Weevil	Insecta	546409
82429475	2021/06/07 11:30 PM EDT	2021-06-07	2021-06-08 03:30:00 UTC	Eastern Time (US & Canada)	3530072	jeffniz	2021-06-10 15:36:10 UTC	2021-06-12 05:38:42 UTC	research	CC-BY-NC	https://www.inaturalist.org/observations/82429475	https://inaturalist-open-data.s3.amazonaws.com/photos/135284667/medium.jpg				1	0	false		Virginia, US	38.1514498408	-78.6876817515		28300	obscured		true			Avocado Weevil	Heilipus apiatus	Avocado Weevil	Insecta	546409
84385372	Thu Jun 24 2021 10:14:16 GMT -0500 (CDT)	2021-06-24	2021-06-24 15:14:16 UTC	Central Time (US & Canada)	4273913	kbeachus	2021-06-25 03:13:23 UTC	2021-11-30 18:49:18 UTC	research	CC-BY-NC	https://www.inaturalist.org/observations/84385372	https://inaturalist-open-data.s3.amazonaws.com/photos/138687466/medium.jpeg				2	0	false	333	Nashville	36.0963897705	-87.0036087036					false			Avocado Weevil	Heilipus apiatus	Avocado Weevil	Insecta	546409
84656392	2021/06/26 11:24 AM CDT	2021-06-26	2021-06-26 16:24:00 UTC	Central Time (US & Canada)	2042957	tshahan	2021-06-27 05:06:06 UTC	2021-06-27 05:16:45 UTC	needs_id	CC-BY-NC-ND	https://www.inaturalist.org/observations/84656392	https://inaturalist-open-data.s3.amazonaws.com/photos/139161826/medium.jpg				1	0	false		Oklahoma, US	36.3307749035	-95.814568235	6218	28563	obscured		true			Avocado Weevil	Heilipus apiatus	Avocado Weevil	Insecta	546409
87395191	Sat Jul 17 2021 08:38:46 GMT-0500 (CDT)	2021-07-17	2021-07-17 08:38:46 UTC	UTC	4536564	amandahildebrant	2021-07-17 13:45:28 UTC	2021-07-31 13:23:07 UTC	research	CC-BY-NC	https://www.inaturalist.org/observations/87395191	https://inaturalist-open-data.s3.amazonaws.com/photos/144085046/medium.jpg				1	0	false	3	SH-485 Loop, Gladewater, TX, US	32.524405	-94.94255	22	22			false			Avocado Weevil	Heilipus apiatus	Avocado Weevil	Insecta	546409
88160916	2021/07/22 11:14 AM EDT	2021-07-22	2021-07-22 15:14:00 UTC	Eastern Time (US & Canada)	746176	john_abrams	2021-07-22 18:58:24 UTC	2021-07-23 12:11:02 UTC	needs_id	CC-BY	https://www.inaturalist.org/observations/88160916	https://static.inaturalist.org/photos/145422612/medium.jpeg				1	0	false		Madison, Kentucky, United States	37.560825	-84.236235					false			Avocado Weevil	Heilipus apiatus	Avocado Weevil	Insecta	546409
88961539	2021/07/28	2021-07-28		Eastern Time (US & Canada)	1044905	icycatelf	2021-07-28 17:30:17 UTC	2021-07-28 21:57:44 UTC	research	CC-BY-NC	https://www.inaturalist.org/observations/88961539	https://inaturalist-open-data.s3.amazonaws.com/photos/146850286/medium.jpg				1	0	false		Johnson County, KY, USA	37.8048335	-82.8640623	30975	30975			false			Avocado Weevil	Heilipus apiatus	Avocado Weevil	Insecta	546409
89426951	2021-07-29 04:35:51	2021-07-29	2021-07-29 08:35:51 UTC	Eastern Time (US & Canada)	1850732	djscho	2021-08-01 03:00:00 UTC	2021-08-02 10:57:53 UTC	needs_id	CC-BY	https://www.inaturalist.org/observations/89426951	https://inaturalist-open-data.s3.amazonaws.com/photos/147674250/medium.jpeg				1	0	false	2	Leland, NC, USA	34.1846147748	-78.0345569551	333	333			false	gps	gps	True Weevils	Heilipus apiatus	Avocado Weevil	Insecta	546409
89537397	2021/08/01 6:58 AM CDT	2021-08-01	2021-08-01 11:58:00 UTC	Central Time (US & Canada)	2042957	tshahan	2021-08-01 20:16:45 UTC	2021-08-01 23:32:16 UTC	needs_id	CC-BY-NC-ND	https://www.inaturalist.org/observations/89537397	https://inaturalist-open-data.s3.amazonaws.com/photos/147868184/medium.jpg				1	0	false		Oklahoma, US	36.2116917758	-95.9902067453	8719	28563	obscured		true			Avocado Weevil	Heilipus apiatus	Avocado Weevil	Insecta	546409
90685277	2021/08/10 6:03 AM UTC	2021-08-10	2021-08-10 06:03:00 UTC	UTC	2153844	maxmom	2021-08-10 18:19:56 UTC	2021-08-10 21:58:56 UTC	needs_id	CC-BY-NC	https://www.inaturalist.org/observations/90685277	https://inaturalist-open-data.s3.amazonaws.com/photos/149898751/medium.jpeg				1	0	false		Burkeville Va	37.1617276584	-78.1867610246	15	15			false			Avocado Weevil	Heilipus apiatus	Avocado Weevil	Insecta	546409
102780443	2012/07/31 8:30 AM CDT	2012-07-31	2012-07-31 13:30:00 UTC	Central Time (US & Canada)	21259	adamschaffer	2021-12-09 19:48:38 UTC	2021-12-10 09:53:59 UTC	needs_id	CC-BY-NC	https://www.inaturalist.org/observations/102780443	https://inaturalist-open-data.s3.amazonaws.com/photos/171882758/medium.jpeg			was only playing dead	1	0	false		ONSC	36.2574502329	-93.7039211744	337	337			false			Heilipus apiatus	Heilipus apiatus	Avocado Weevil	Insecta	546409
